# Supplementary material for: Factors Associated with Cervical Cancer Screening among Married Female Immigrants with Korean Husbands in South Korea
Source: PubMed Central journal article supplement (PMC6266390; doi:10.3390/ijerph15112528), 2018-11-12
Supplement: ijerph-15-02528-s001.pdf [file ijerph-15-02528-s001.pdf]

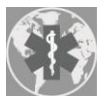

**Table S1.** Nationality of eligible population.

| <b>Nationality</b>   | <b>N (%)</b> |
|----------------------|--------------|
| China                | 9067 (56.90) |
| Vietnam              | 2773 (17.40) |
| Philippines          | 1098 (6.89)  |
| Japan                | 1031 (6.47)  |
| Mongolia             | 359 (2.25)   |
| Thailand             | 353 (2.21)   |
| Cambodia             | 278 (1.74)   |
| Uzbekistan           | 198 (1.24)   |
| Russian Federation   | 190 (1.19)   |
| United States        | 98 (0.61)    |
| Taiwan, China        | 66 (0.41)    |
| Nepal                | 59 (0.37)    |
| Indonesia            | 56 (0.35)    |
| Kyrgyz Republic      | 41 (0.26)    |
| Kazakhstan           | 36 (0.23)    |
| Canada               | 26 (0.16)    |
| Hong Kong SAR, China | 21 (0.13)    |
| Pakistan             | 19 (0.12)    |
| Lao PDR              | 17 (0.11)    |
| Malaysia             | 13 (0.08)    |
| Bangladesh           | 12 (0.07)    |
| United Kingdom       | 9 (0.06)     |
| Peru                 | 8 (0.05)     |
| Myanmar              | 8 (0.05)     |
| Sri Lanka            | 6 (0.04)     |
| Turkey               | 6 (0.04)     |
| Australia            | 6 (0.04)     |
| Mexico               | 5 (0.03)     |
| Ukraine              | 5 (0.03)     |
| Belarus              | 4 (0.03)     |
| Austria              | 4 (0.03)     |
| France               | 4 (0.03)     |
| Guatemala            | 3 (0.02)     |
| Morocco              | 3 (0.02)     |
| Moldova              | 3 (0.02)     |
| Singapore            | 3 (0.02)     |
| India                | 3 (0.02)     |
| South Africa         | 2 (0.01)     |
| Netherlands          | 2 (0.01)     |
| New Zealand          | 2 (0.01)     |
| Romania              | 2 (0.01)     |
| Bulgaria             | 2 (0.01)     |
| Brazil               | 2 (0.01)     |
| Argentina            | 2 (0.01)     |
| El Salvador          | 2 (0.01)     |
| Ethiopia             | 2 (0.01)     |
| Italy                | 2 (0.01)     |
| Congo, Rep.          | 2 (0.01)     |

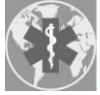

|                           |           |
|---------------------------|-----------|
| <b>Ghana</b>              | 1 (0.006) |
| <b>Guyana</b>             | 1 (0.006) |
| <b>Greece</b>             | 1 (0.006) |
| <b>Norway</b>             | 1 (0.006) |
| <b>Germany</b>            | 1 (0.006) |
| <b>Benin</b>              | 1 (0.006) |
| <b>Bolivia</b>            | 1 (0.006) |
| <b>Burundi</b>            | 1 (0.006) |
| <b>Swaziland</b>          | 1 (0.006) |
| <b>Spain</b>              | 1 (0.006) |
| <b>Ireland</b>            | 1 (0.006) |
| <b>Ecuador</b>            | 1 (0.006) |
| <b>Honduras</b>           | 1 (0.006) |
| <b>Uruguay</b>            | 1 (0.006) |
| <b>Iran, Islamic Rep.</b> | 1 (0.006) |
| <b>Djibouti</b>           | 1 (0.006) |
| <b>Chad</b>               | 1 (0.006) |
| <b>Colombia</b>           | 1 (0.006) |
| <b>Paraguay</b>           | 1 (0.006) |
| <b>Poland</b>             | 1 (0.006) |
| <b>Finland</b>            | 1 (0.006) |
| <b>Hungary</b>            | 1 (0.006) |

---
